# Supplementary material
Source: publisher site journal article supplement (https://www.degruyterbrill.com/publication/isbn/9783110190786/downloadAsset/9783110190786_Vorwort.pdf)
Supplement: Supplementary file 1 [file 9783110190786_Vorwort.pdf]

## Vorwort

Mit dem vorliegenden Band II des Gesamtregisters findet die Arbeit an der *Theologischen Realenzyklopädie* nach rund 30 Jahren ihren Abschluß.

Neben Bibelstellen, Orten und Sachen im Band I werden im Band II die in der TRE vorkommenden Personennamen mit den jeweiligen Fundstellen aufgelistet. Darüber hinaus werden alle an der Erstellung der TRE beteiligten Mitarbeiterinnen und Mitarbeiter genannt. Damit sind die Personennamen, die im Text der TRE erwähnt werden, zum ersten Mal umfassend erschlossen. Hinweise zur Gestaltung und Nutzung der einzelnen Register finden sich unten.

An dieser Stelle sei all denjenigen gedankt, die zum Zustandekommen dieses zweiten Bandes des Gesamtregisters beigetragen haben:

An der Neuerausarbeitung der Personennamen waren Anne Brisgen, Luitgard Demir, Dorit Grau, Frauke Gremse, Katrin Hofmann, Anke Jargot, Arnulf Kaus, Jan Kromminga, Enrico Kunz-Lenski, Uta Lehnert, Heinrich Loeber, Henrik von Maltzahn, Sabine Münchow, Sebastian Oertel, Franziska Patzak, Marlen Reinke, Johannes Ruschke, Martin Schabow, Claudia Steiger-Hoffleit, Sara Strüßmann, Hannah Wagner, Alexander Wieckowski und Sybille Wüstemann beteiligt.

Die Listen der Mitarbeiterinnen und Mitarbeiter hat Uta Lehnert zusammengeführt und bearbeitet.

Katrin Ott hat in Zusammenarbeit mit Tobias Kirchhof und Christof Rudolf Kraus die erfaßten Daten durchgesehen und zeichnet für die redaktionelle Bearbeitung wesentlicher Teile des Namensregisters verantwortlich.

Für die Durchsicht der Druckfahnen gilt mein Dank den beiden Herausgebern Gerhard Müller und Knut Schäferdiek.

Allen am Gesamtunternehmen *Theologische Realenzyklopädie* beteiligten Herausgebern, Autorinnen und Autoren sowie Verlagsmitarbeitern sei hier nochmals Anerkennung und Dank ausgesprochen. Fast einhundert Jahre nach dem letzten regulären Textband der 3. Auflage der *Realencyklopädie für protestantische Theologie und Kirche* (RE) ist nun die *Theologische Realenzyklopädie* vollendet. Sie bietet eine umfassende enzyklopädische Bündelung theologischer Forschung an der Schwelle zum 21. Jahrhundert.

Berlin, im Oktober 2007

Albrecht Döhnert
